# Supplementary material for: Proteomic analysis of exported chaperone/co-chaperone complexes of P. falciparum reveals an array of complex protein-protein interactions
Source: PubMed Central journal article supplement (PMC5316994; doi:10.1038/srep42188), 2017-02-20
Supplement: srep42188-s2.pdf [file srep42188-s2.pdf]

**Proteomic analysis of exported chaperone/co-chaperone complexes of *P. falciparum* reveals an array of complex protein-protein interactions.**

Qi Zhang, Cheng Ma, Alexander Oberli, Astrid Zinz, Sonja Engels and Jude M Przyborski\*

**Legends to Supplementary Material**

**Supplementary Table S1. Proteins identified by crosslink followed by co-IP using either anti-GFP or anti-PfHsp70x.** ID, PlasmoDB accession number; UP, unique peptides; PC, peptide coverage. Localization based on literature or Apiloc predictions.

**Supplementary Table S2. Human proteins identified by crosslink followed by co-IP using either anti-GFP or anti-PfHsp70x.** ID, Uniprot accession number; UP, unique peptides; PC, peptide coverage.

**Supplementary Movie S3. Live cell imaging of GEXP18<sup>GFP</sup> cell line.** Highly mobile fluorescent foci can be observed within the infected erythrocyte.

**Supplementary Figure S4. PfHsp101 localizes only to a “ring” surrounding the parasite, suggestive of a PV localization.** DIC, differential interference contrast.

**Supplementary Table S5. Total proteins detected following SLO permeabilisation, proteinase K treatment and co-IP using anti-PfHsp70x.** ID, PlasmoDB accession number; UP, unique peptides; PC, peptide coverage.

**Supplementary File S6. Full-length blots used to generate figures 1, 2, 3, 4, 6 and 7.**

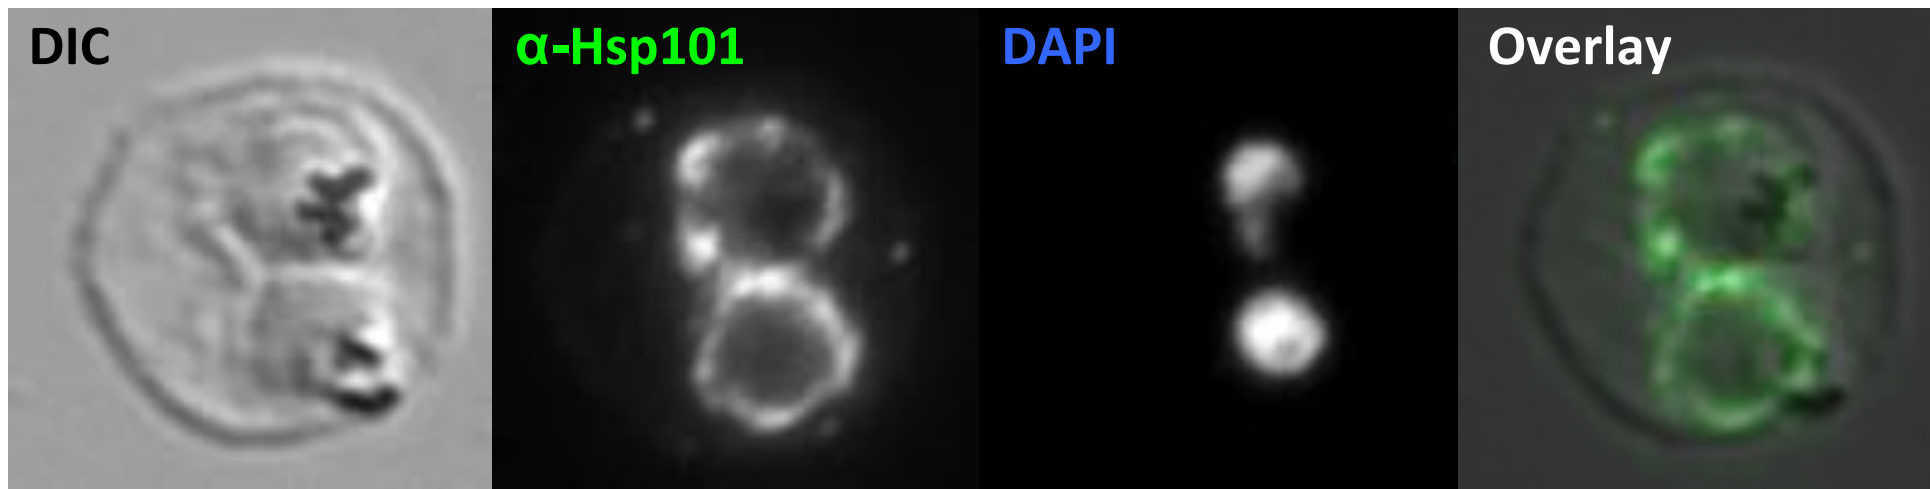

Supplementary Figure S4

## **Supplementary Information file S6**

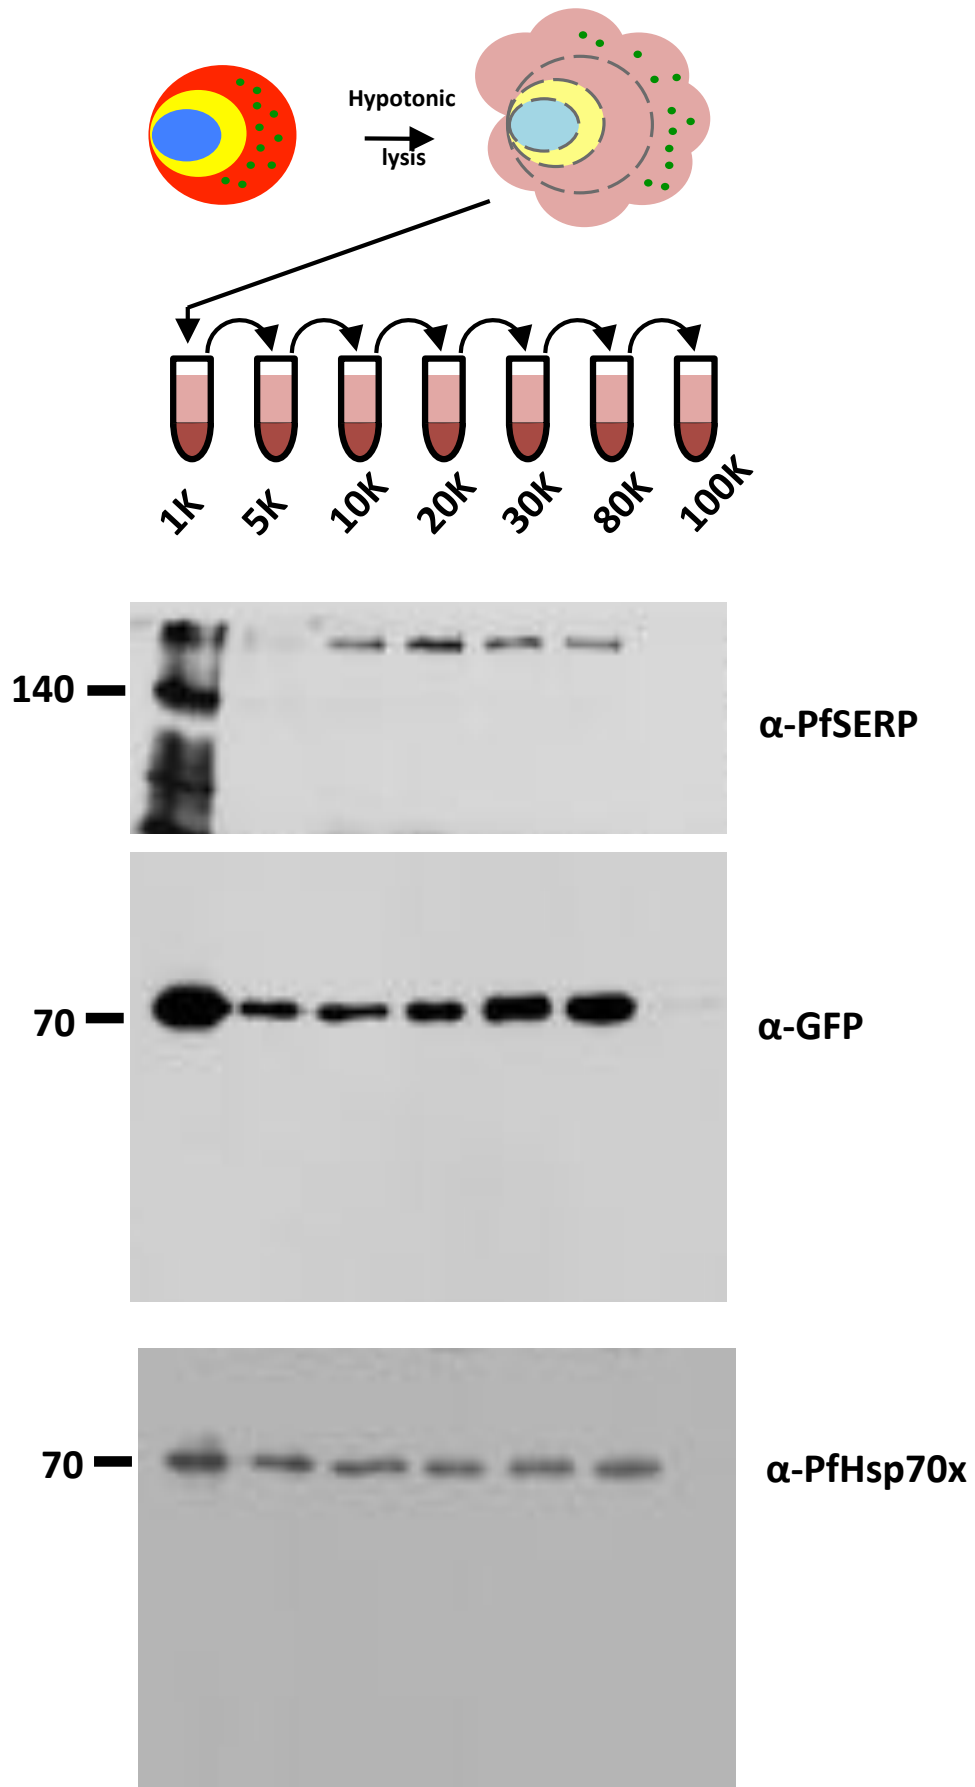

**Figure 1**

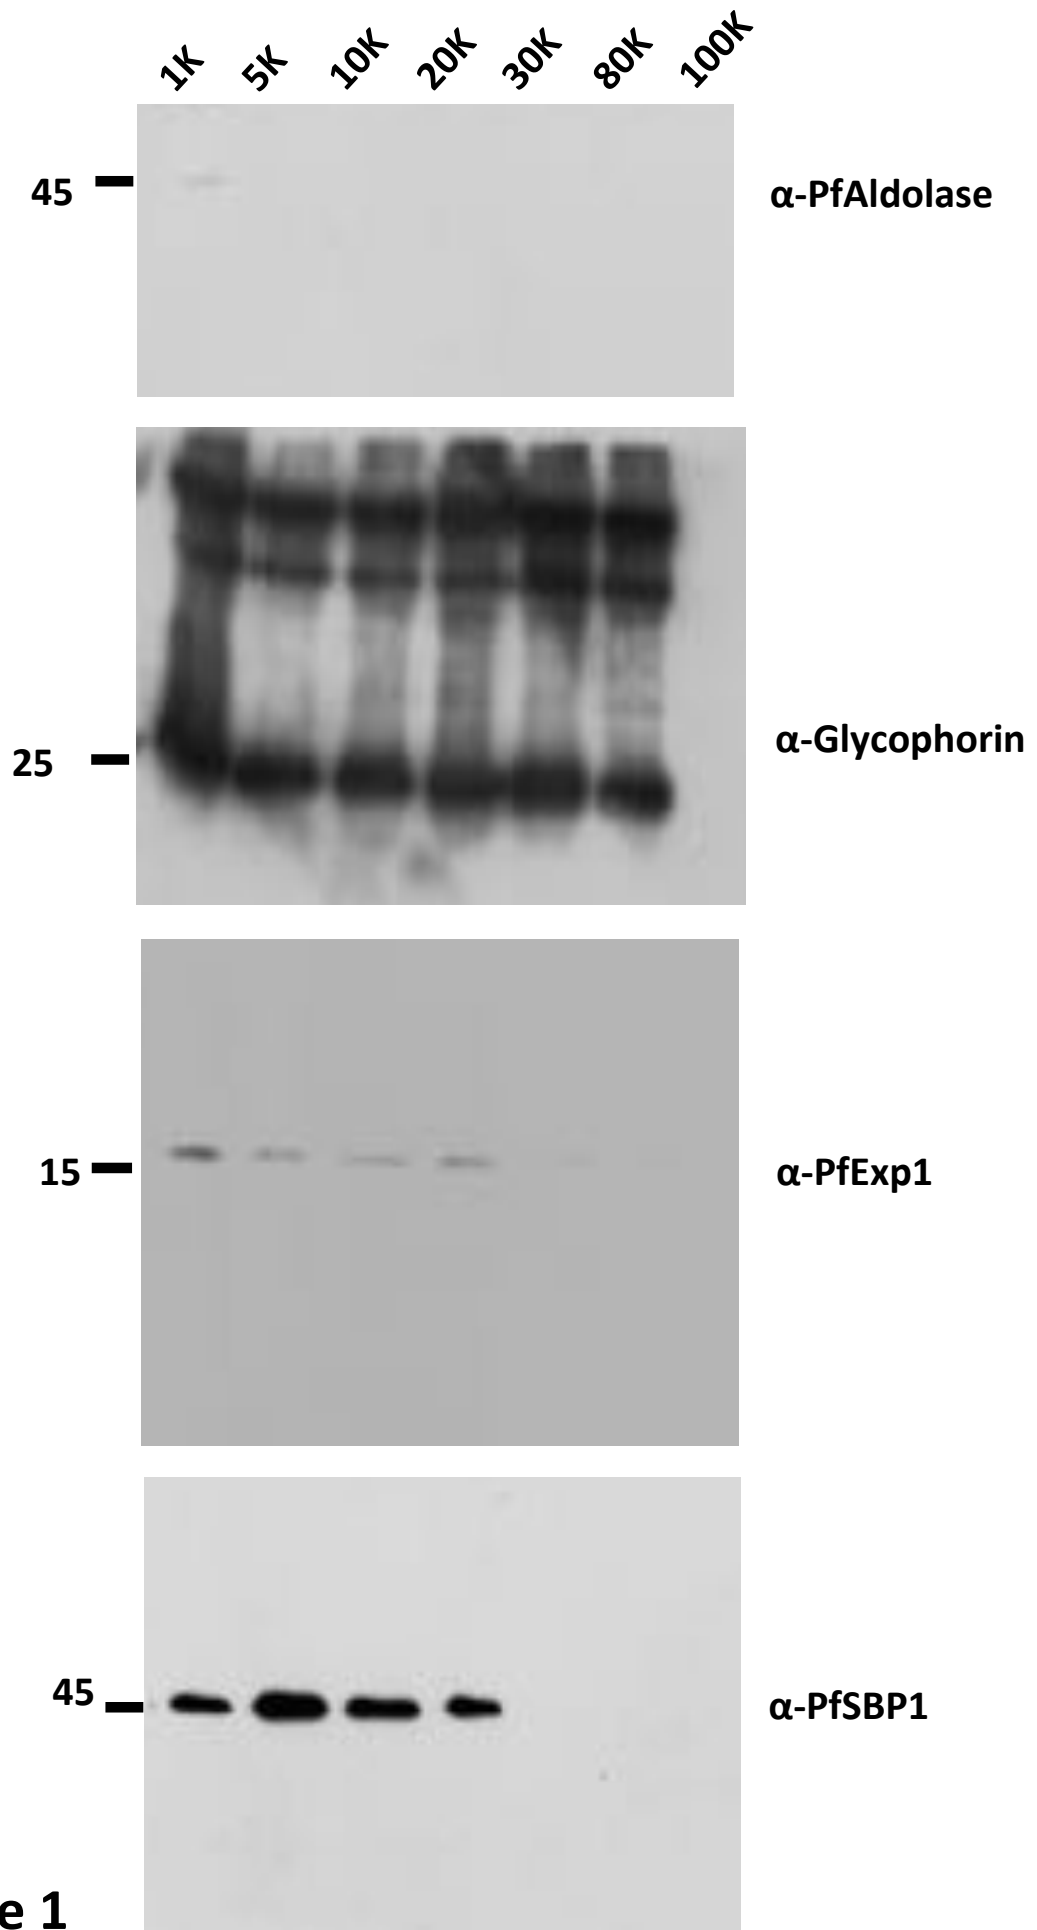

**Figure 1**

**A**

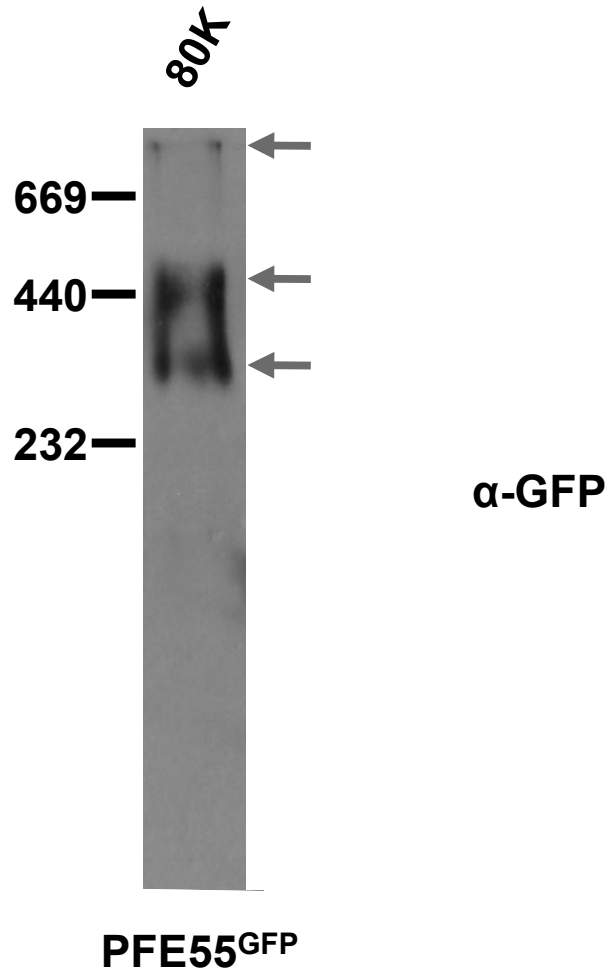

**Figure 2**

**B**

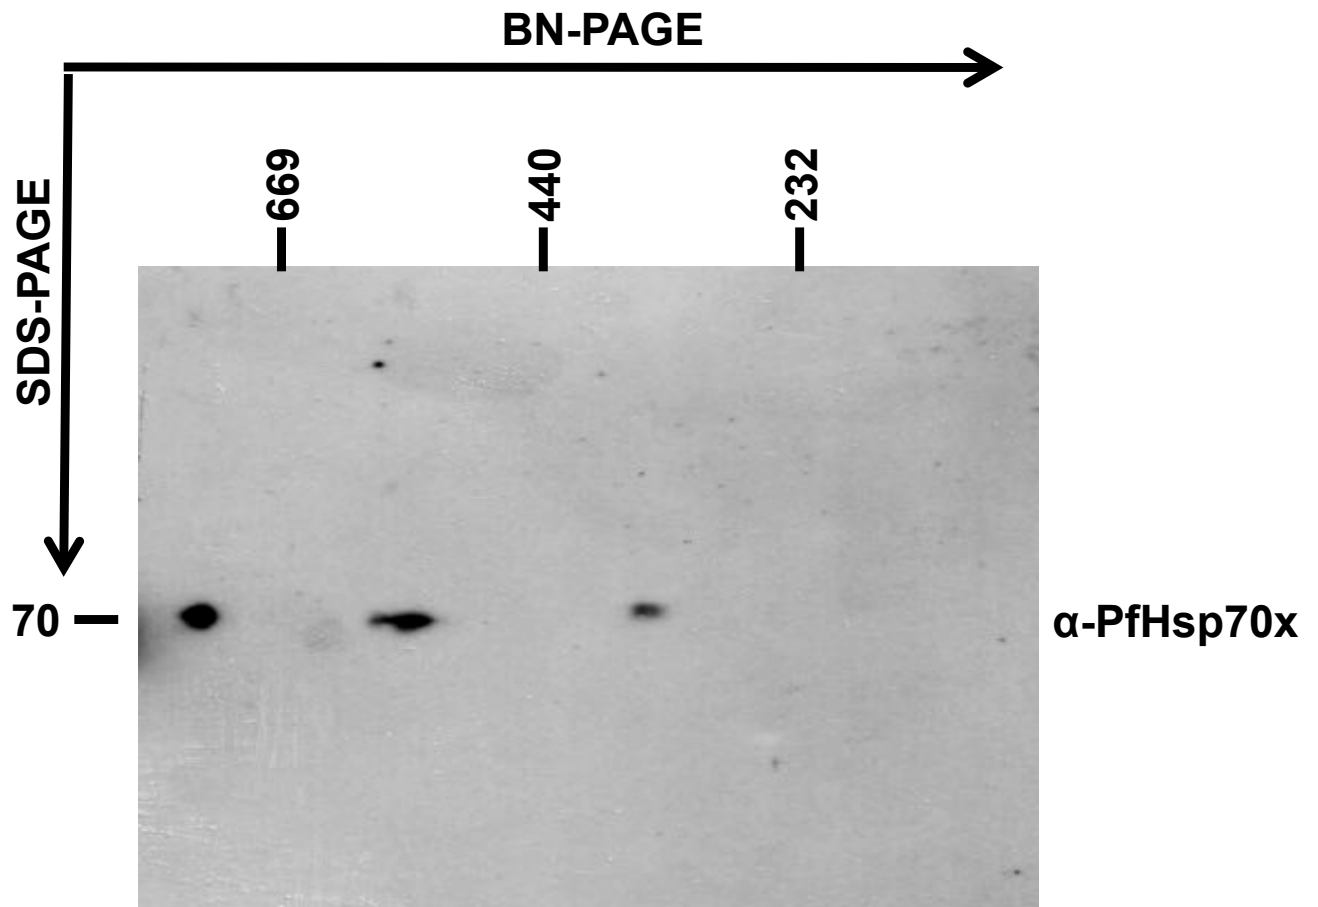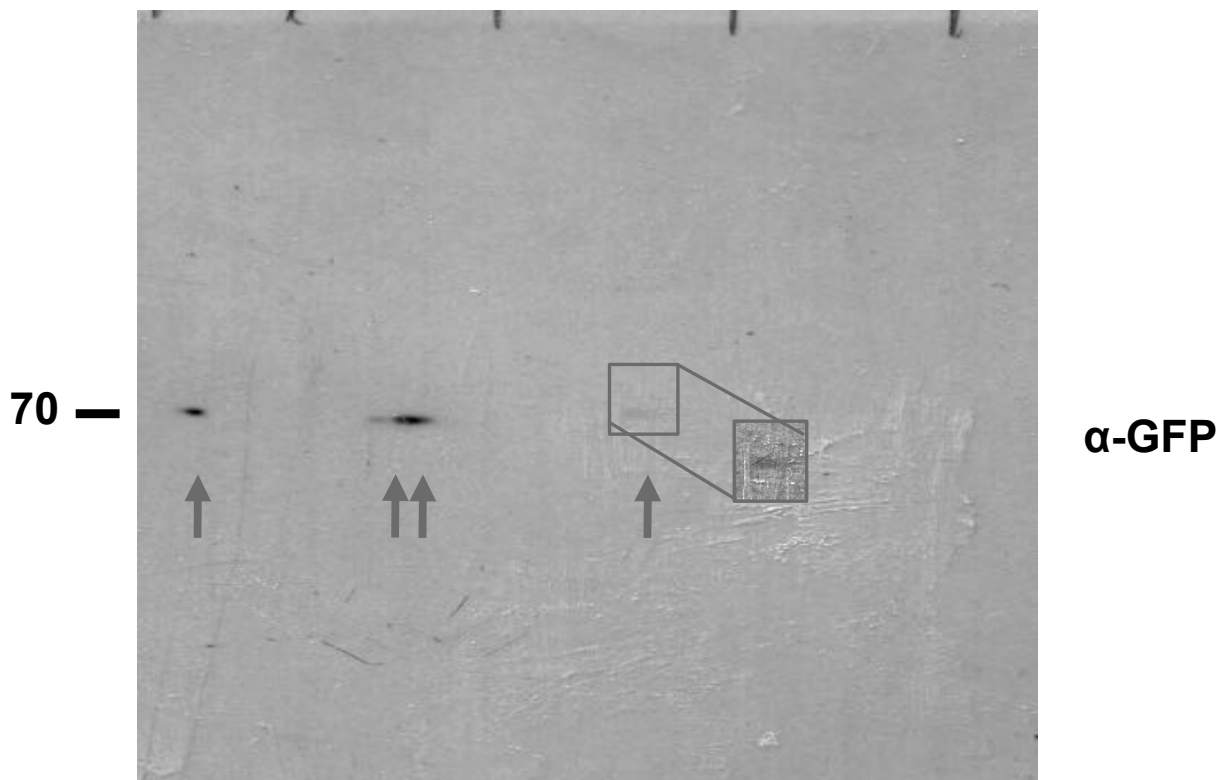

**Figure 2**

**PFE55<sup>GFP</sup>**

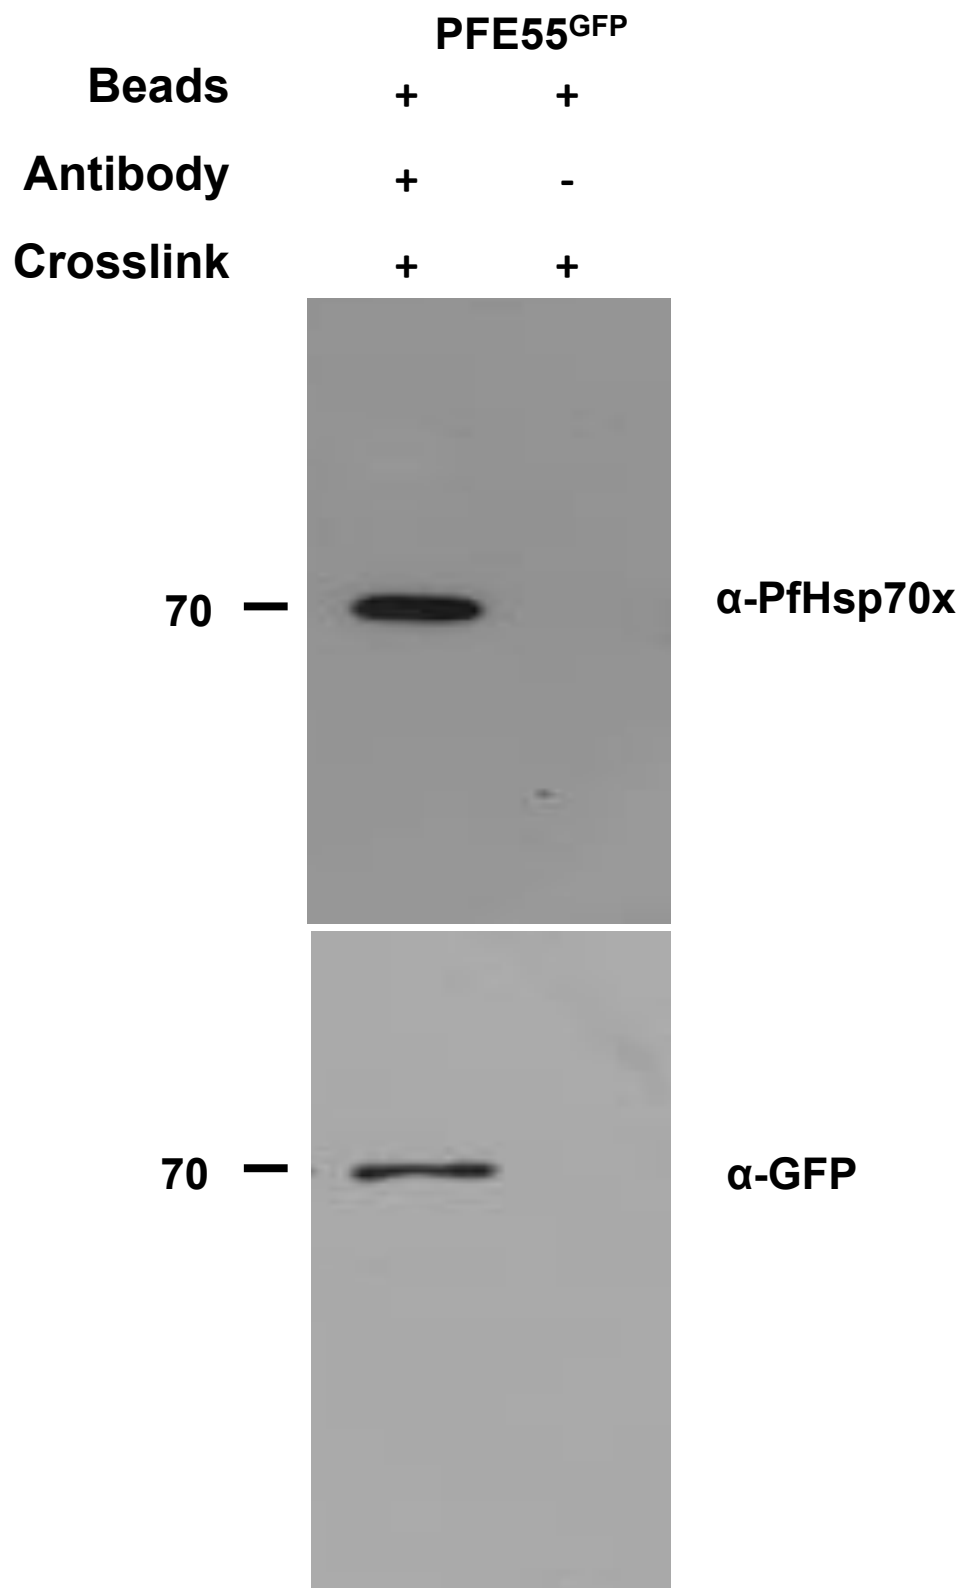

**Figure 3**

IP: α-PfHsp70x



|                  | <b>PFE55<sup>GFP</sup></b> |   |
|------------------|----------------------------|---|
| <b>Beads</b>     | +                          | + |
| <b>Antibody</b>  | +                          | - |
| <b>Crosslink</b> | +                          | + |

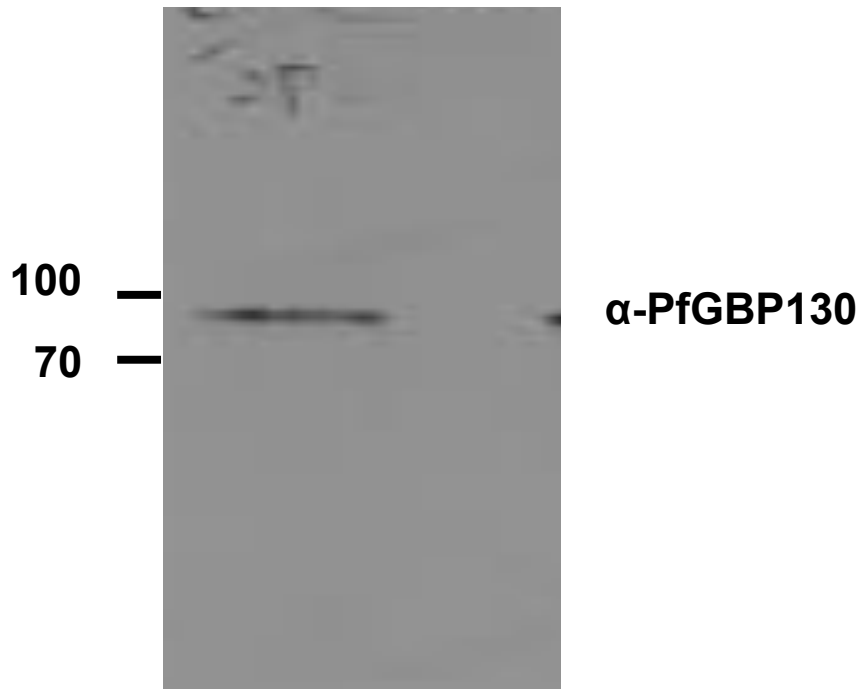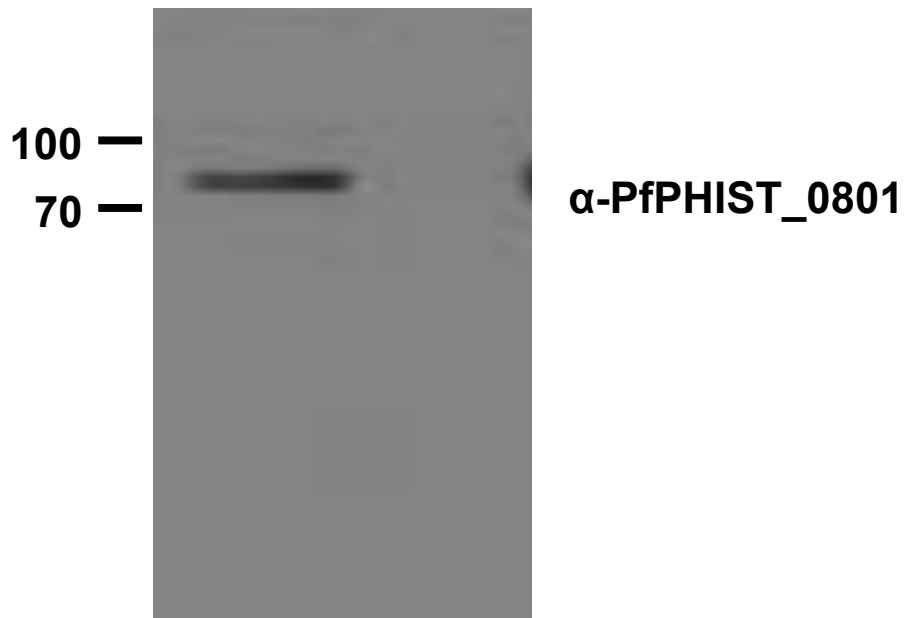

**Figure 3**

**IP:  $\alpha$ -PfHsp70x**

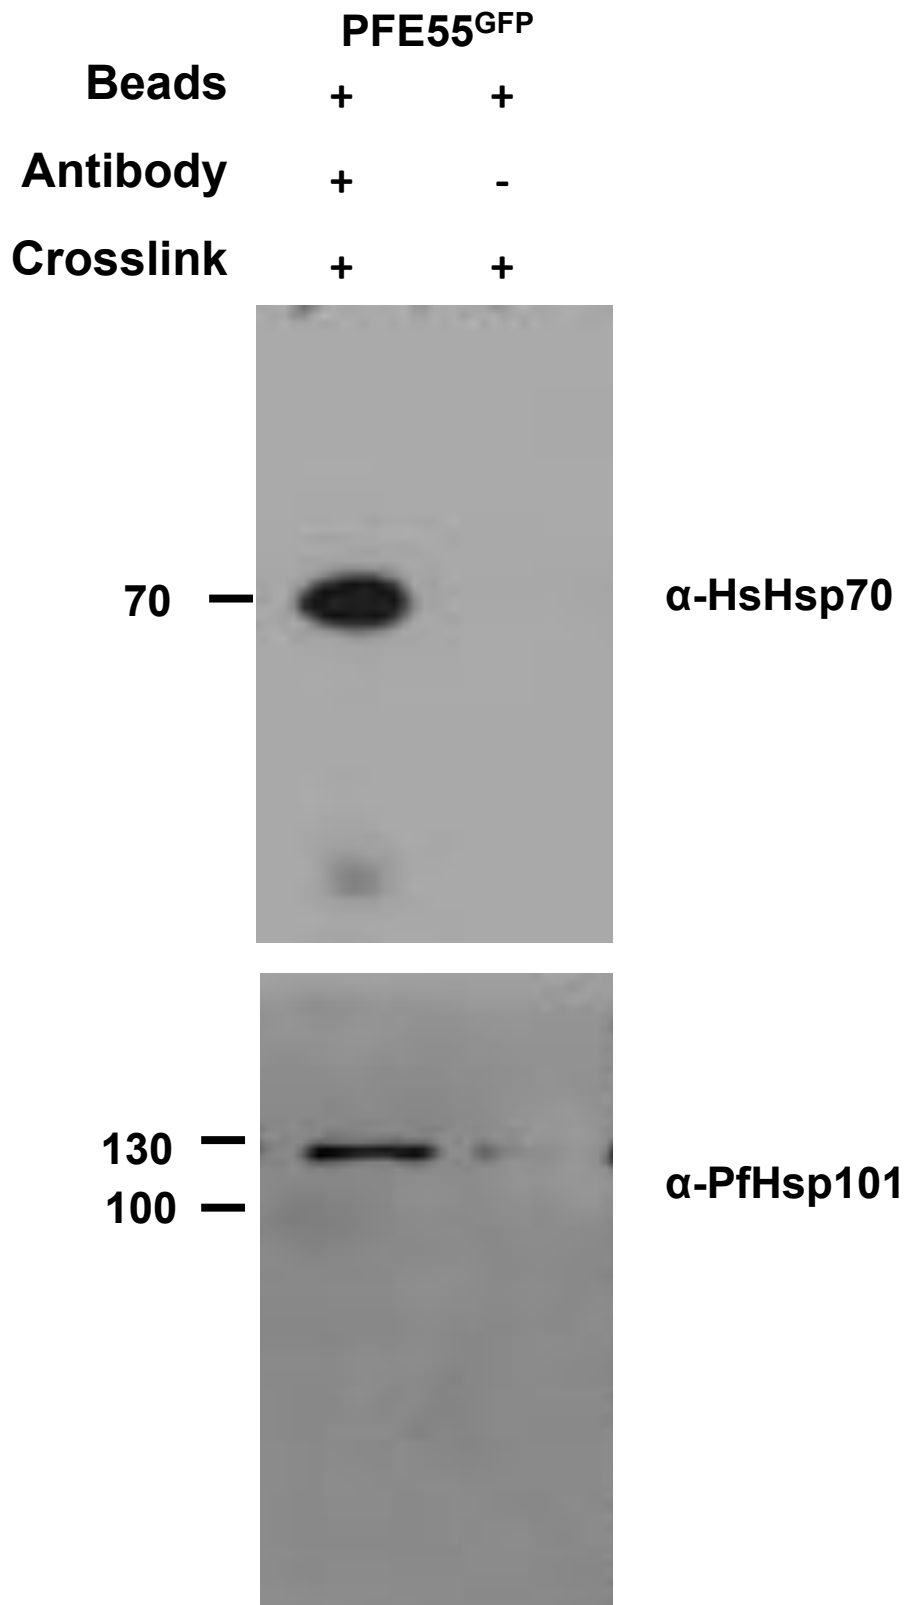

**Figure 3**

**IP: α-PfHsp70x**

|                  | PFE55 <sup>GFP</sup> |   |
|------------------|----------------------|---|
| <b>Beads</b>     | +                    | + |
| <b>Antibody</b>  | +                    | - |
| <b>Crosslink</b> | +                    | + |

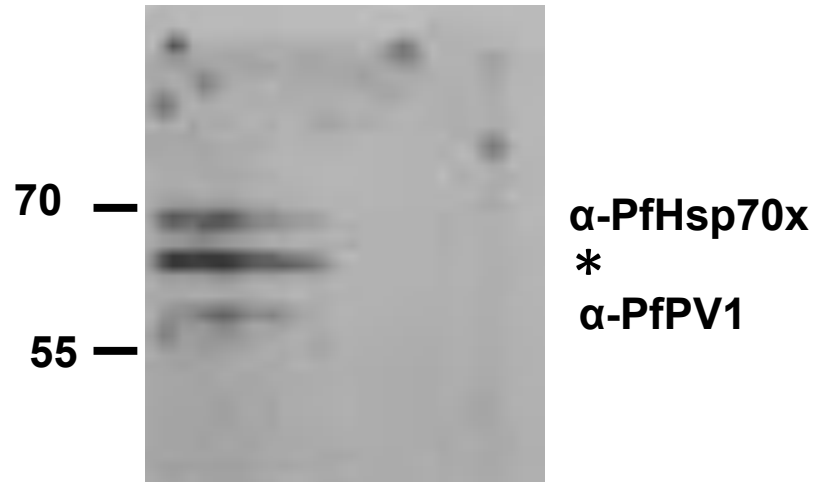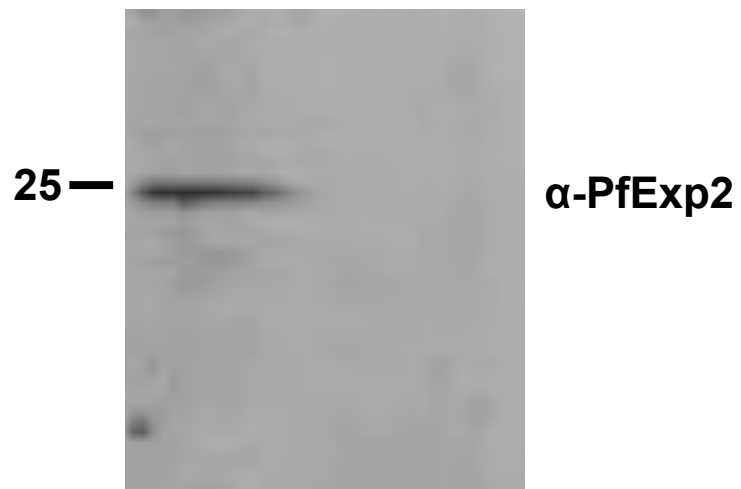

**Figure 3**

**IP: α-PfHsp70x**

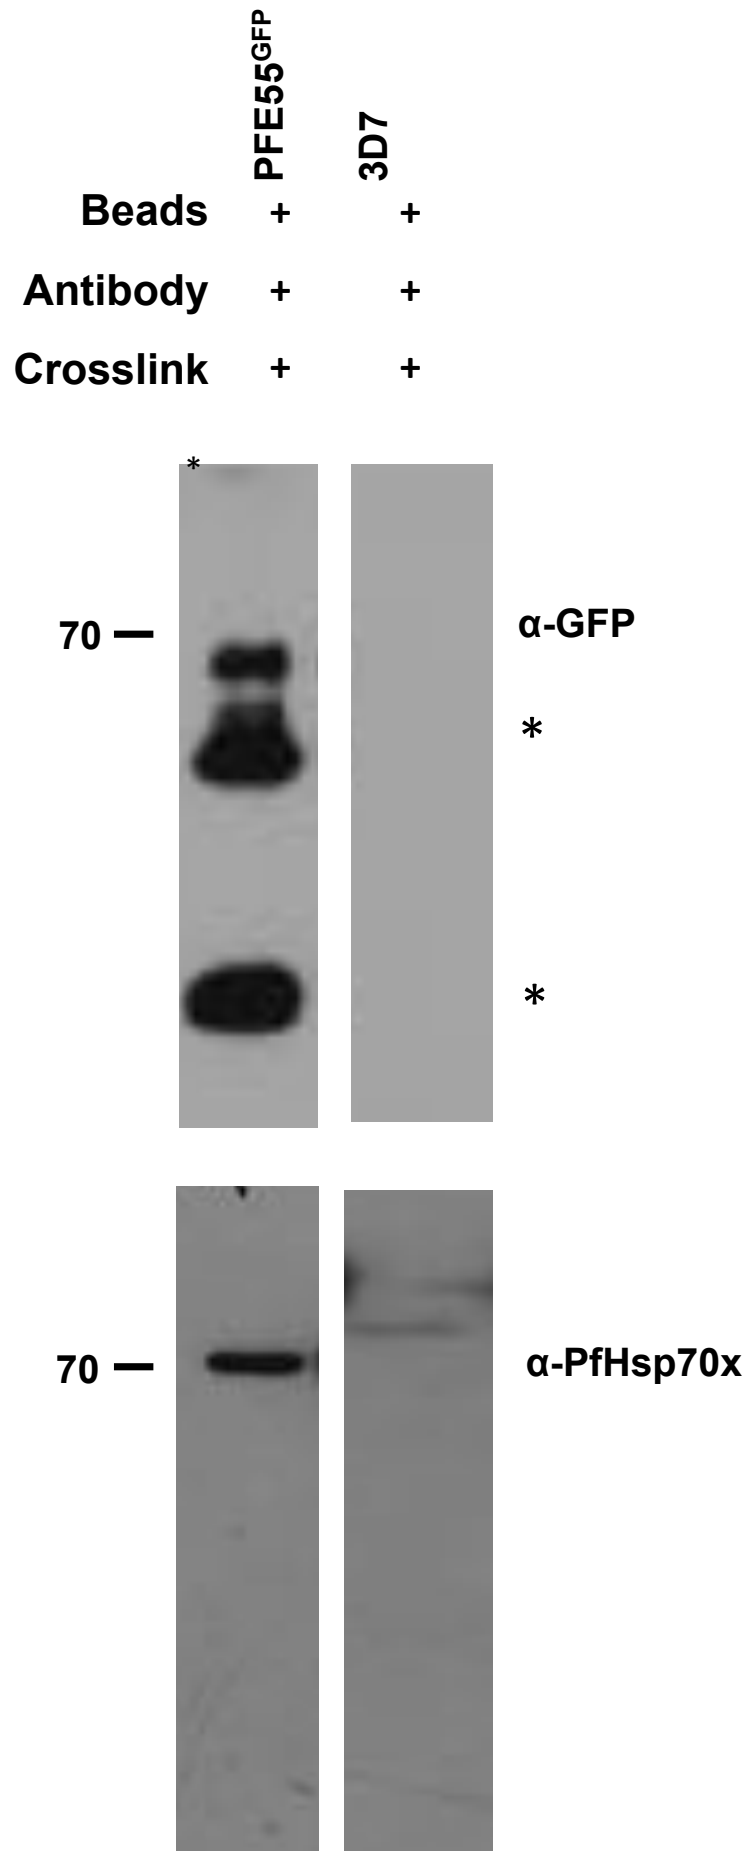

**Figure 4**

**IP: α-GFP**

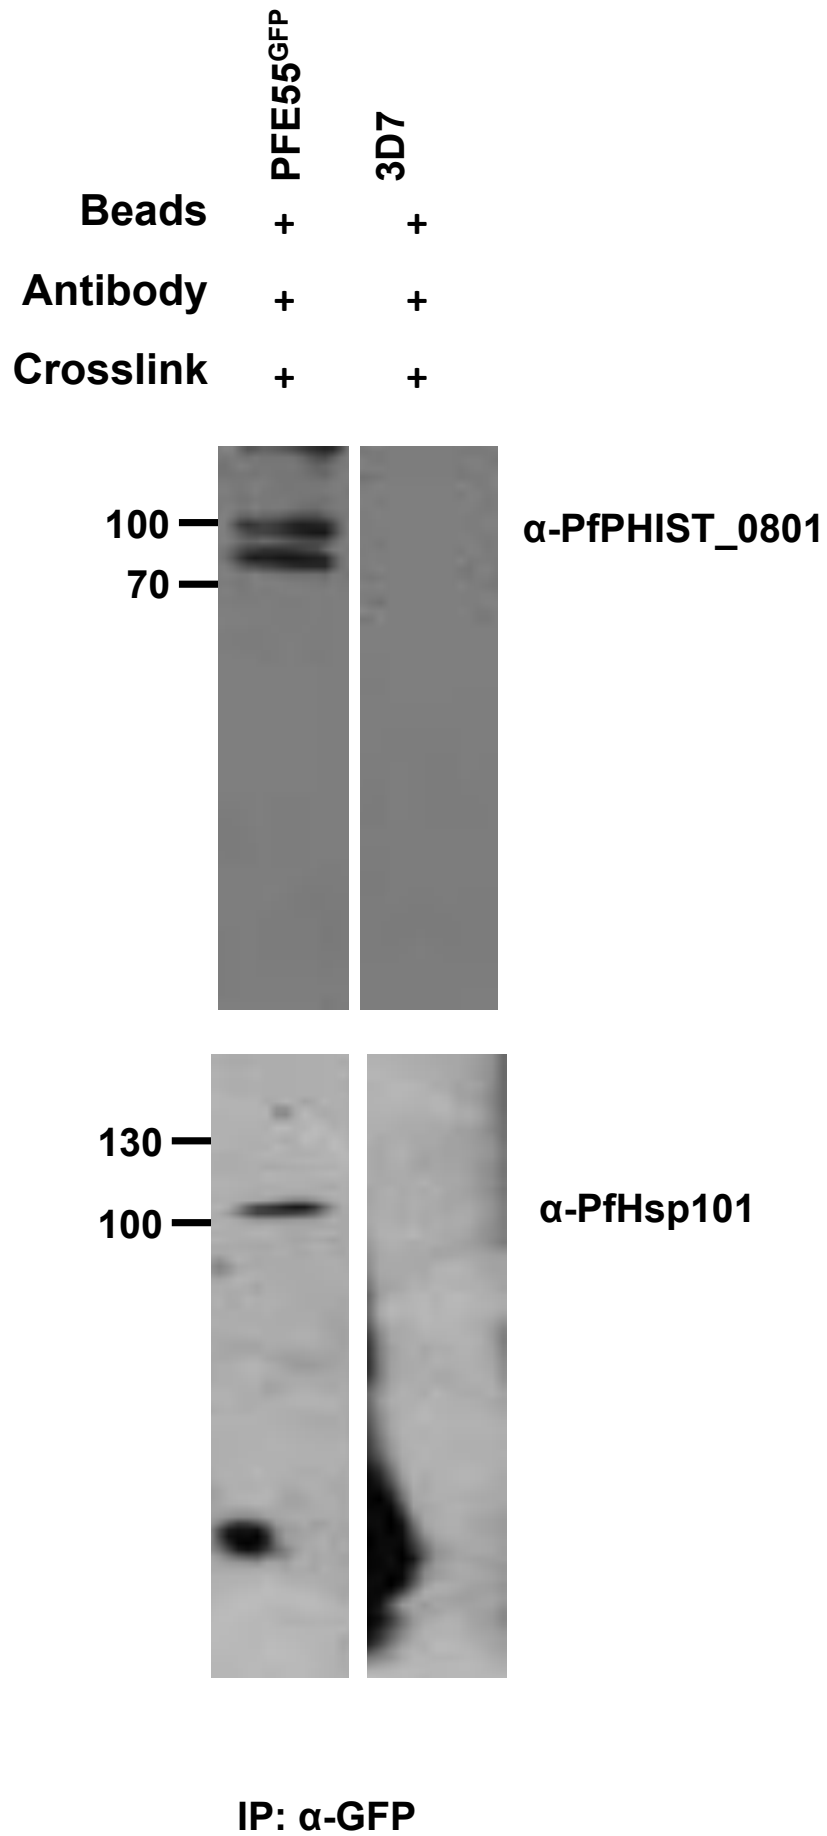

**Figure 4**

|                  |                            |            |
|------------------|----------------------------|------------|
|                  | <b>PFE55<sup>GFP</sup></b> | <b>3D7</b> |
| <b>Beads</b>     | +                          | +          |
| <b>Antibody</b>  | +                          | +          |
| <b>Crosslink</b> | +                          | +          |

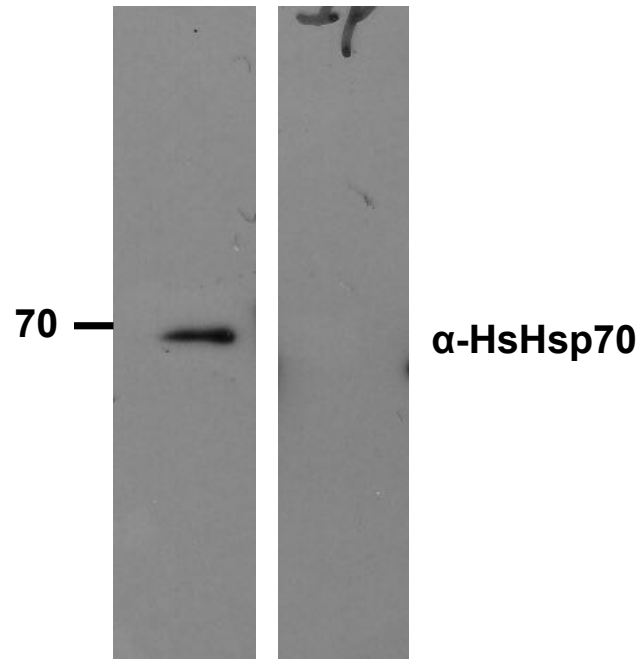

**Figure 4**

IP:  $\alpha$ -GFP

**A**

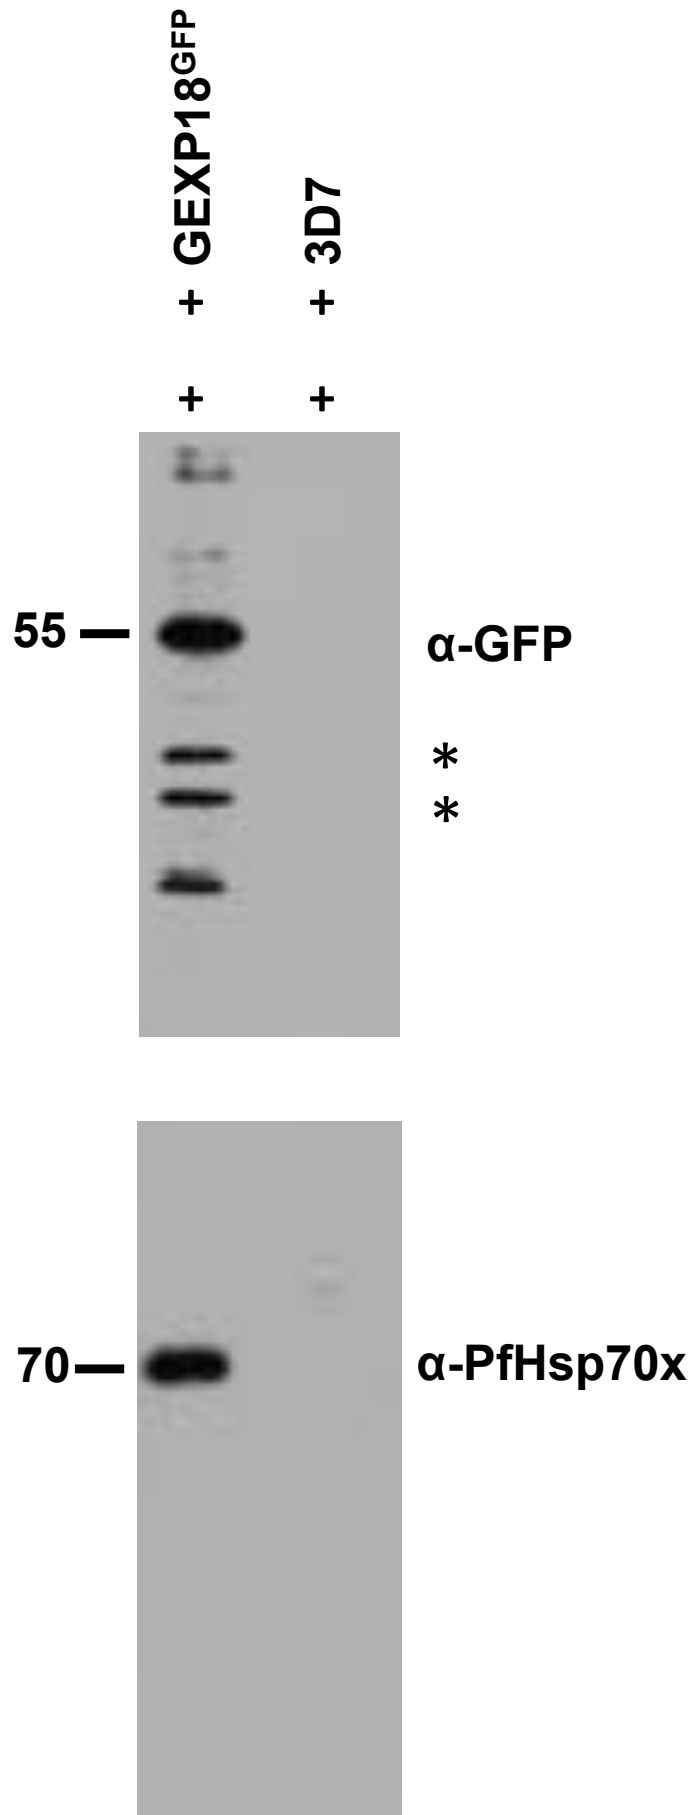

**Figure 6**

**IP: α-GFP**

**B**

|                  | <b>PFE55<sup>GFP</sup></b> |          |
|------------------|----------------------------|----------|
| <b>Beads</b>     | <b>+</b>                   | <b>+</b> |
| <b>Antibody</b>  | <b>+</b>                   | <b>-</b> |
| <b>Crosslink</b> | <b>+</b>                   | <b>+</b> |

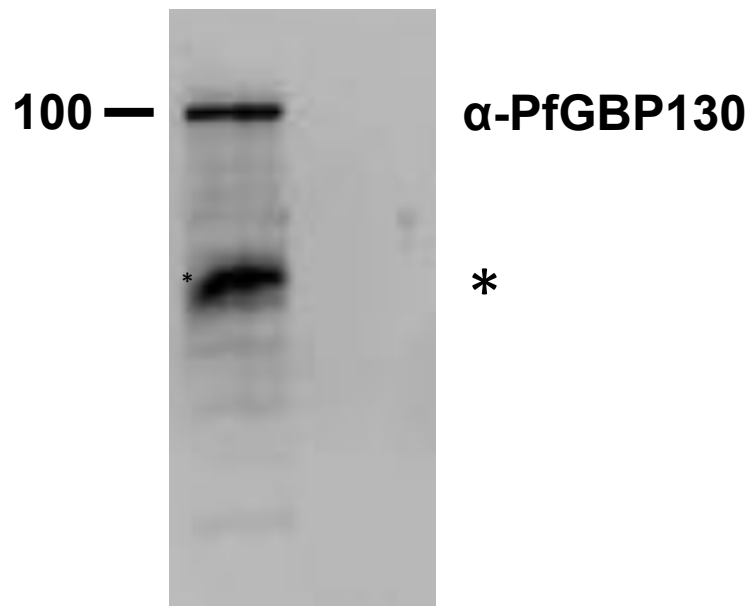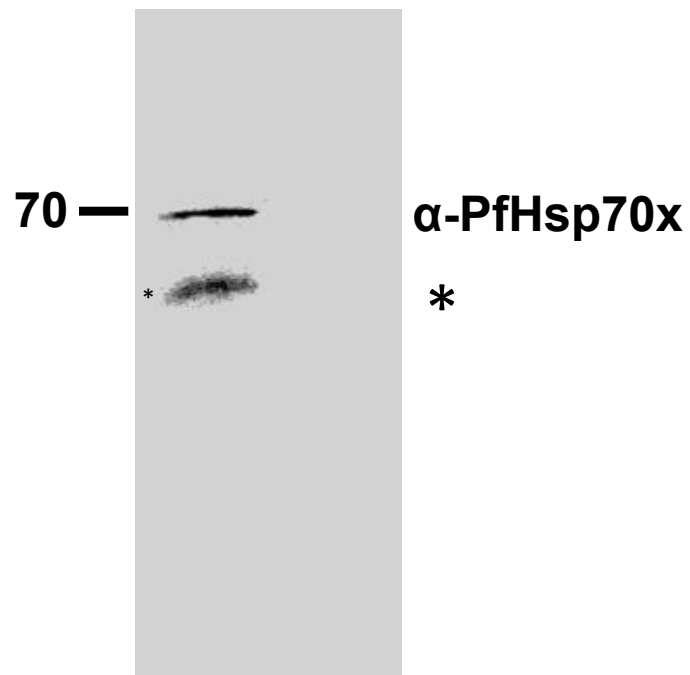

**Figure 6**

**IP:  $\alpha$ -PfGBP130**



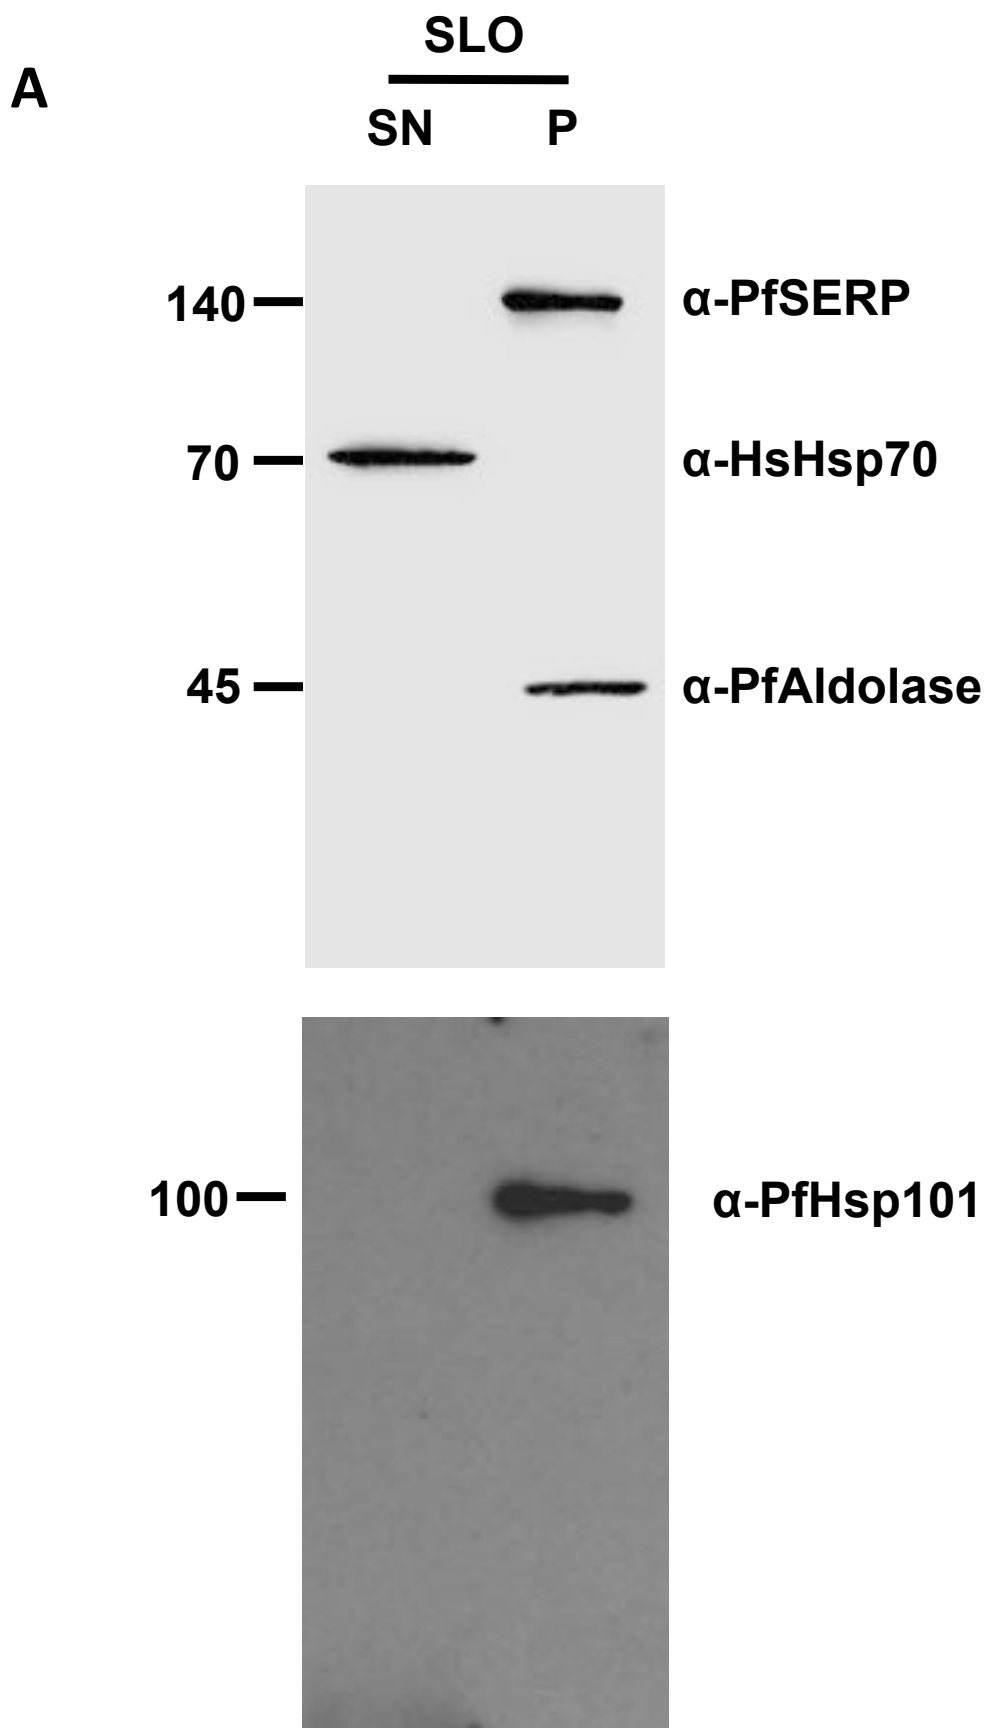

**Figure 7**      **PFE55<sup>GFP</sup>**

**B**

**PFE55<sup>GFP</sup>**

|                  |          |          |
|------------------|----------|----------|
| <b>Beads</b>     | <b>+</b> | <b>+</b> |
| <b>Antibody</b>  | <b>+</b> | <b>-</b> |
| <b>Crosslink</b> | <b>+</b> | <b>+</b> |

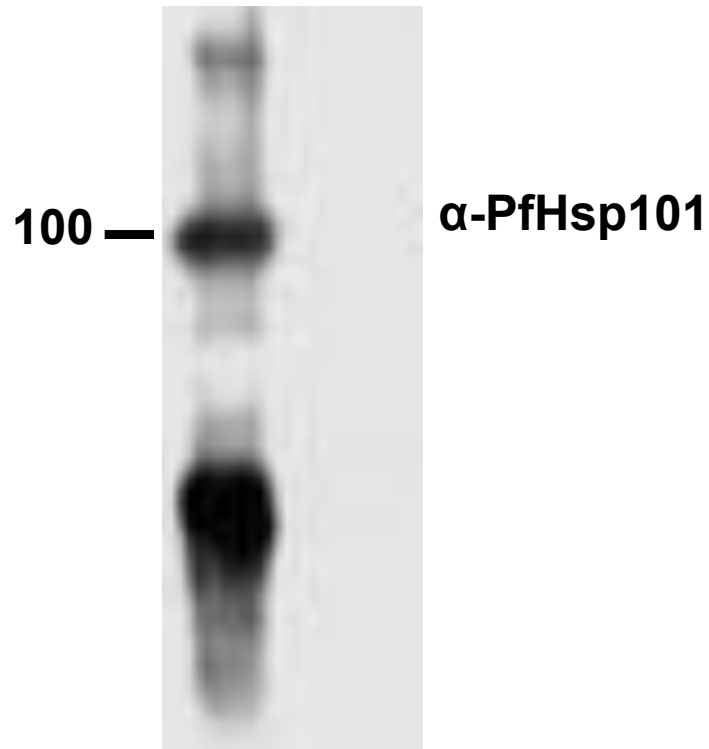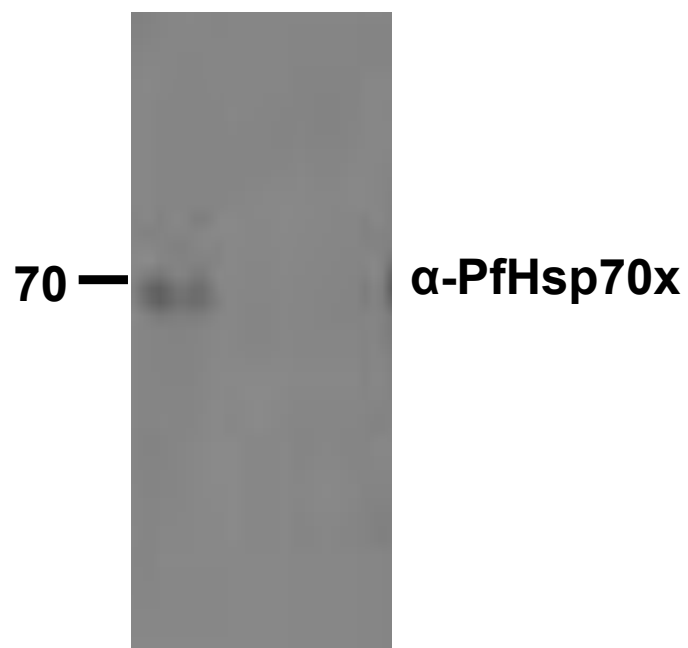

**Figure 7**

**IP:  $\alpha$ -PfHsp101**

**C**

|                     | <b>PFE55<sup>GFP</sup></b> |          |          |          |
|---------------------|----------------------------|----------|----------|----------|
| <b>SAP</b>          | <b>+</b>                   | <b>+</b> | <b>-</b> | <b>-</b> |
| <b>SLO</b>          | <b>-</b>                   | <b>-</b> | <b>+</b> | <b>+</b> |
| <b>Proteinase K</b> | <b>+</b>                   | <b>+</b> | <b>+</b> | <b>+</b> |
|                     | <b>U</b>                   | <b>B</b> | <b>U</b> | <b>B</b> |

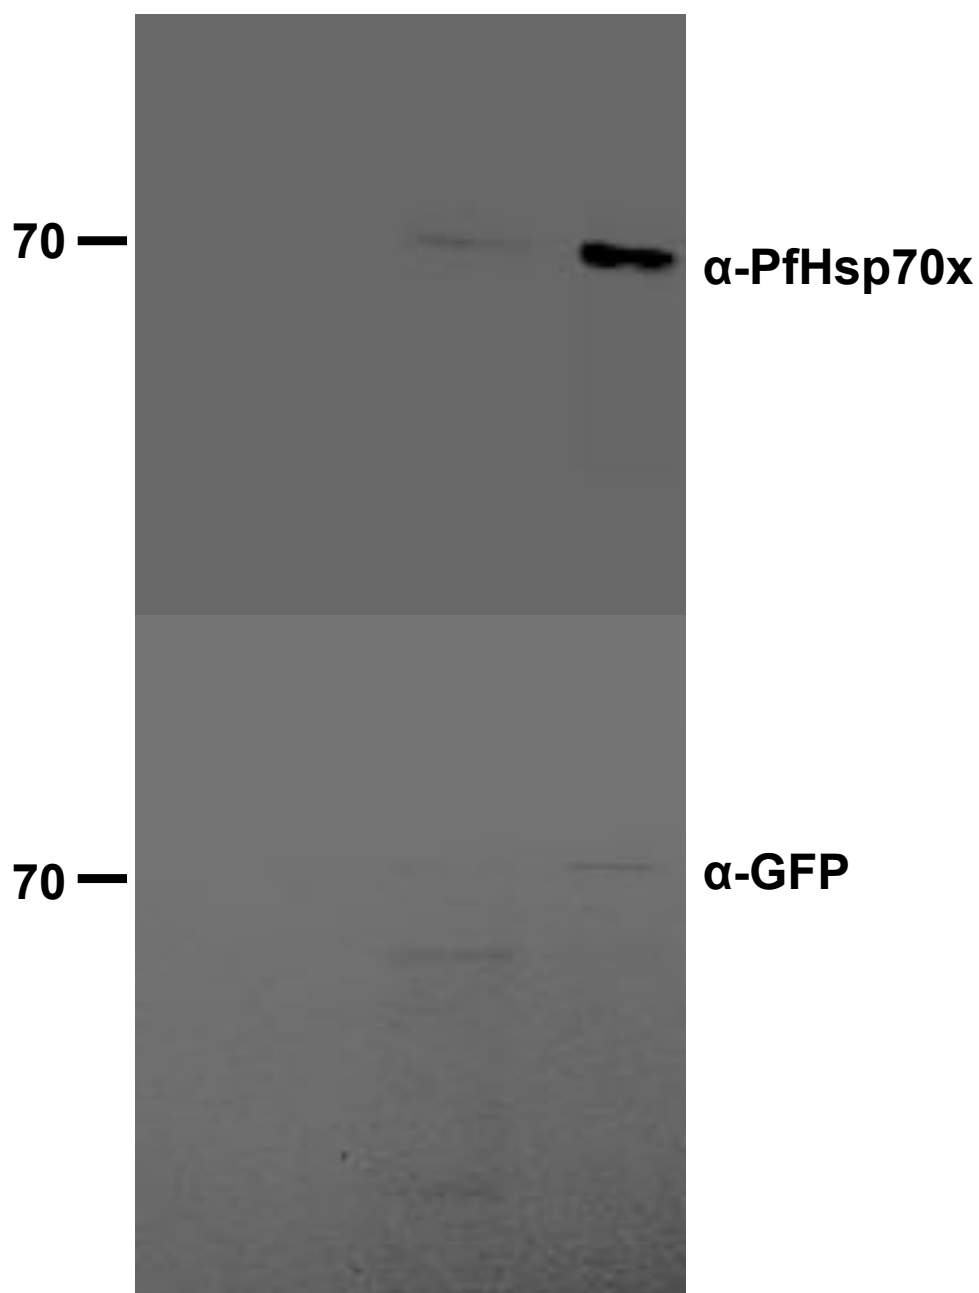

**Figure 7**

**IP:  $\alpha$ -PfHsp70x**

**C**

|                     | <b>PFE55<sup>GFP</sup></b> |          |          |          |
|---------------------|----------------------------|----------|----------|----------|
| <b>SAP</b>          | <b>+</b>                   | <b>+</b> | <b>-</b> | <b>-</b> |
| <b>SLO</b>          | <b>-</b>                   | <b>-</b> | <b>+</b> | <b>+</b> |
| <b>Proteinase K</b> | <b>+</b>                   | <b>+</b> | <b>+</b> | <b>+</b> |
|                     | <b>U</b>                   | <b>B</b> | <b>U</b> | <b>B</b> |

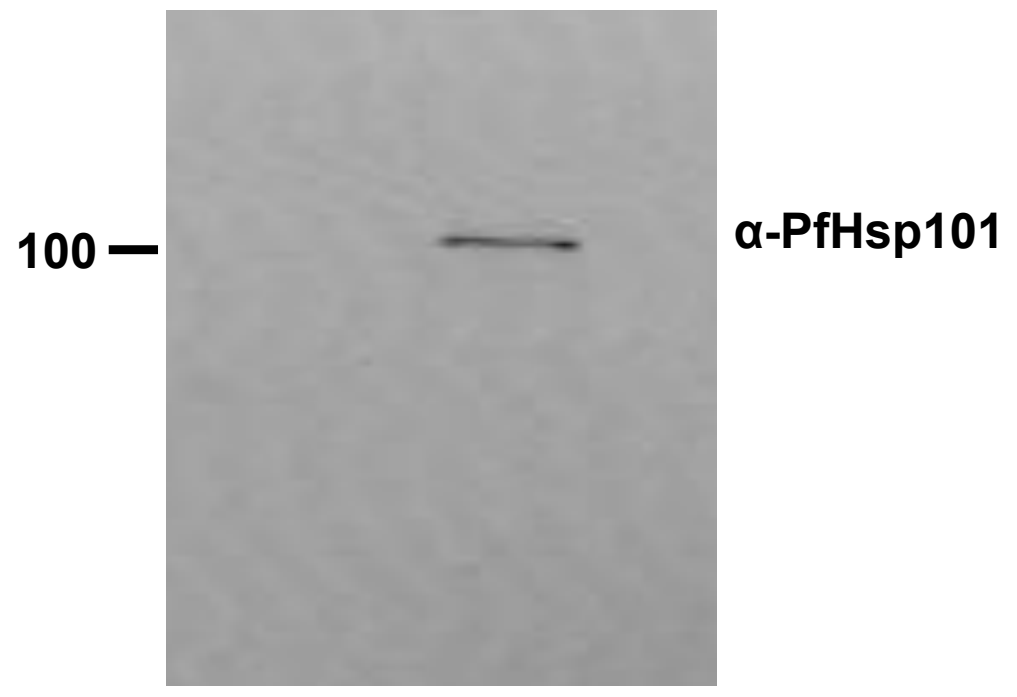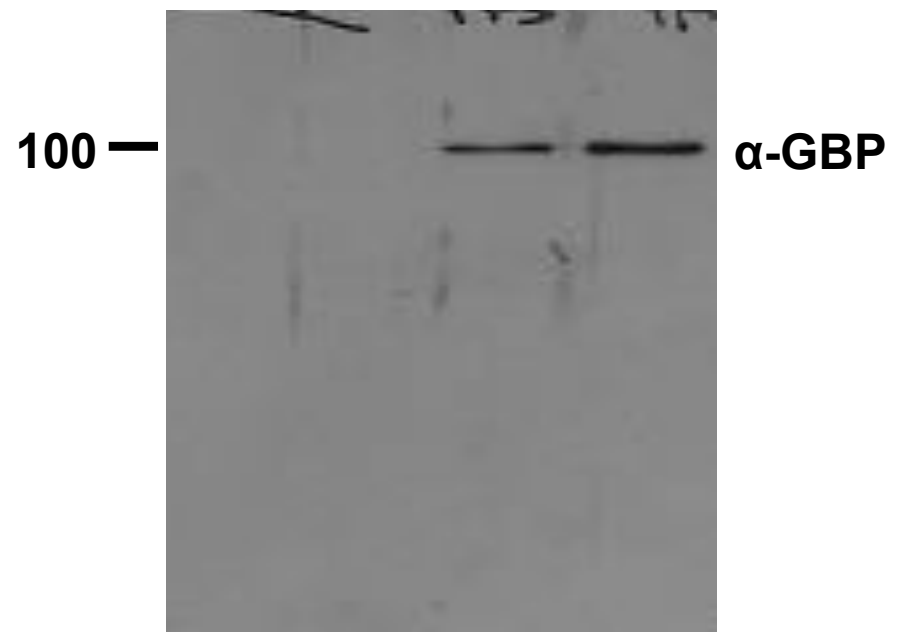

**Figure 7**

**IP:  $\alpha$ -PfHsp70x**
